# Supplementary material
Source: Springer Nature journal article supplement (https://www.springermedizin.de/resource/supplementary/12914_2010_163_MOESM2_ESM.pdf/9536922)

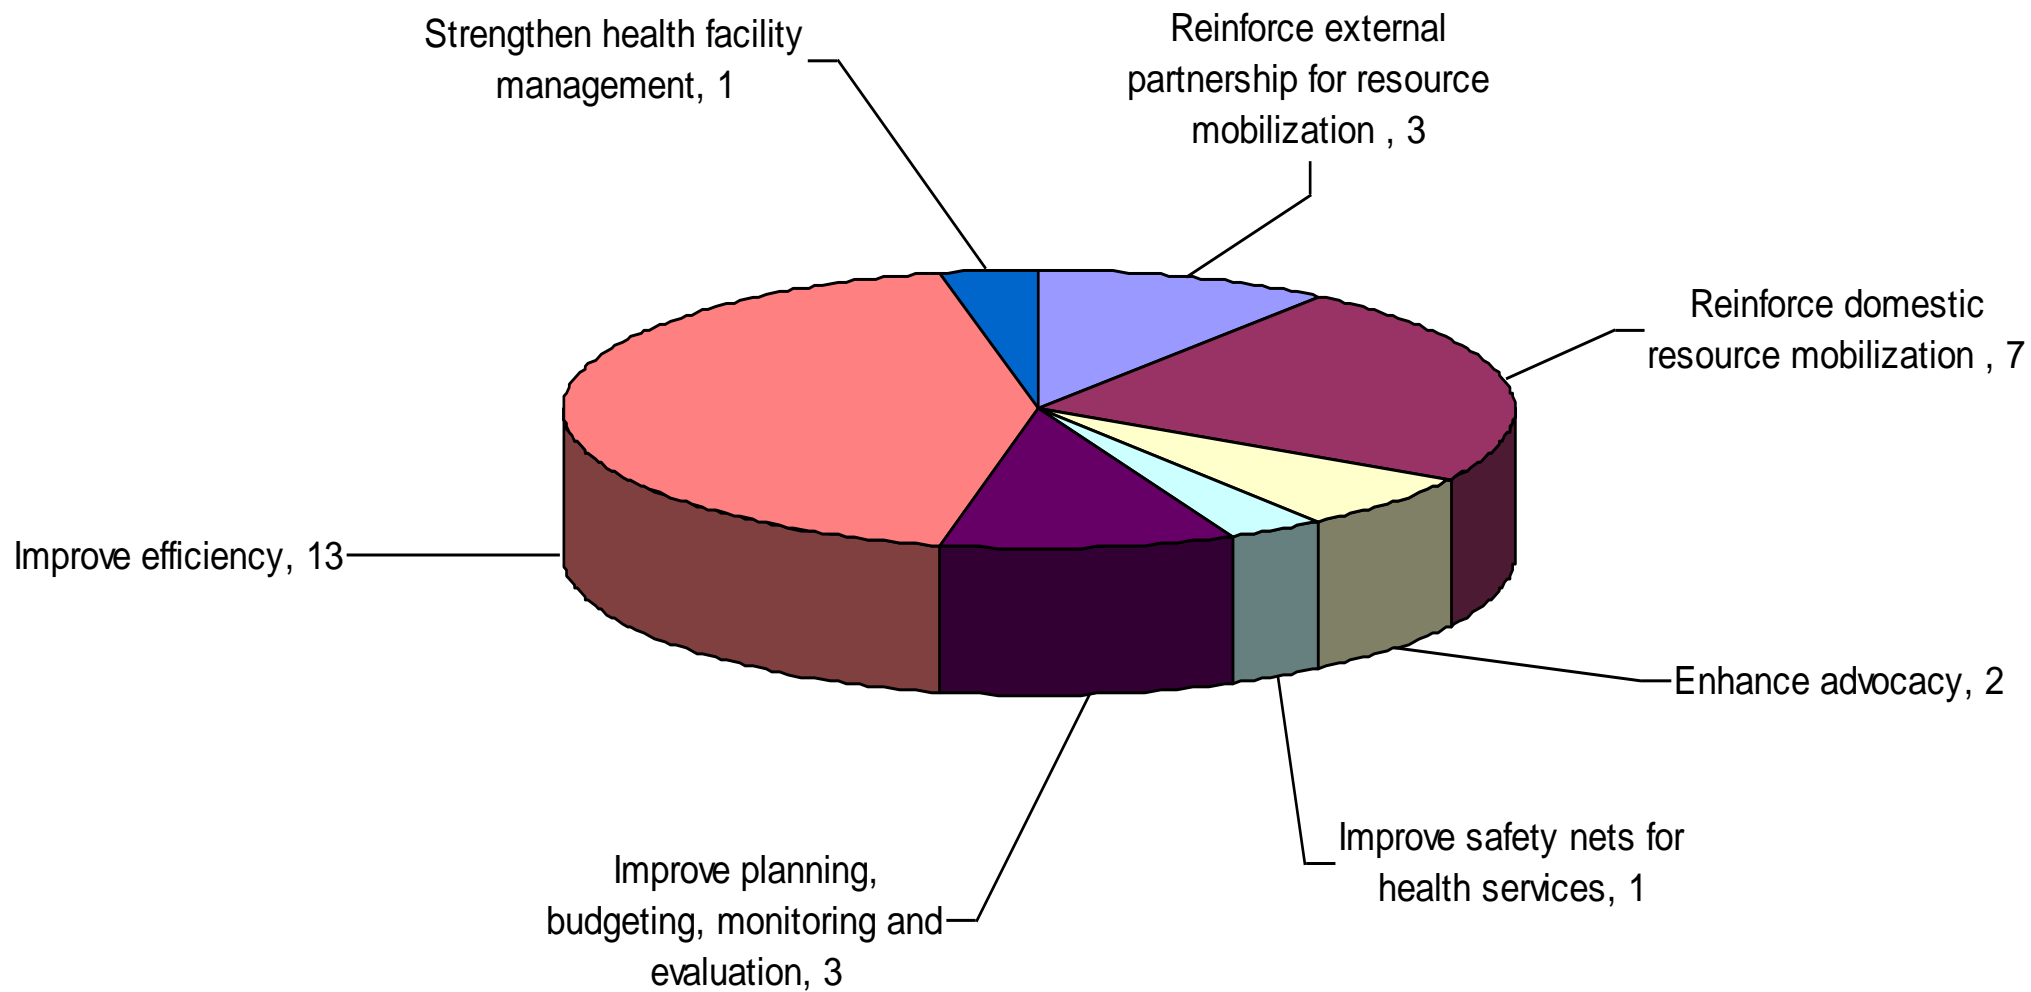

Supplement: MOESM2 [file 9536922]
